# Supplementary material for: Anticoagulant Oligonucleotide–Peptide Conjugates: Identification of Thrombin Aptamer Conjugates with Improved Characteristics
Source: MDPI journal article supplement (doi:10.3390/ijms23073820), 2022-03-30
Supplement: s1 [file s1]

## **Anticoagulant oligonucleotide-peptide conjugates: identification of thrombin aptamer conjugates with improved characteristics**

**Vladimir B. Tsvetkov <sup>2,3</sup>, Irina V. Varizhuk <sup>1</sup>, Nikolay N. Kurochkin <sup>1</sup>, Sergei A. Surzhikov <sup>1</sup>, Igor P. Smirnov <sup>2</sup>, Andrey A. Stomakhin <sup>1</sup>, Natalia A. Kolganova <sup>1</sup> and Edward N. Timofeev <sup>1,\*</sup>**

<sup>1</sup> Engelhardt Institute of Molecular Biology, Russian Academy of Sciences, 119991 Moscow, Russia;

<sup>2</sup> Federal Research and Clinical Center of Physical-Chemical Medicine, 119435 Moscow, Russia;

<sup>3</sup> Institute of Biodesign and Complex System Modeling, Sechenov First Moscow State Medical University, 119146 Moscow, Russia

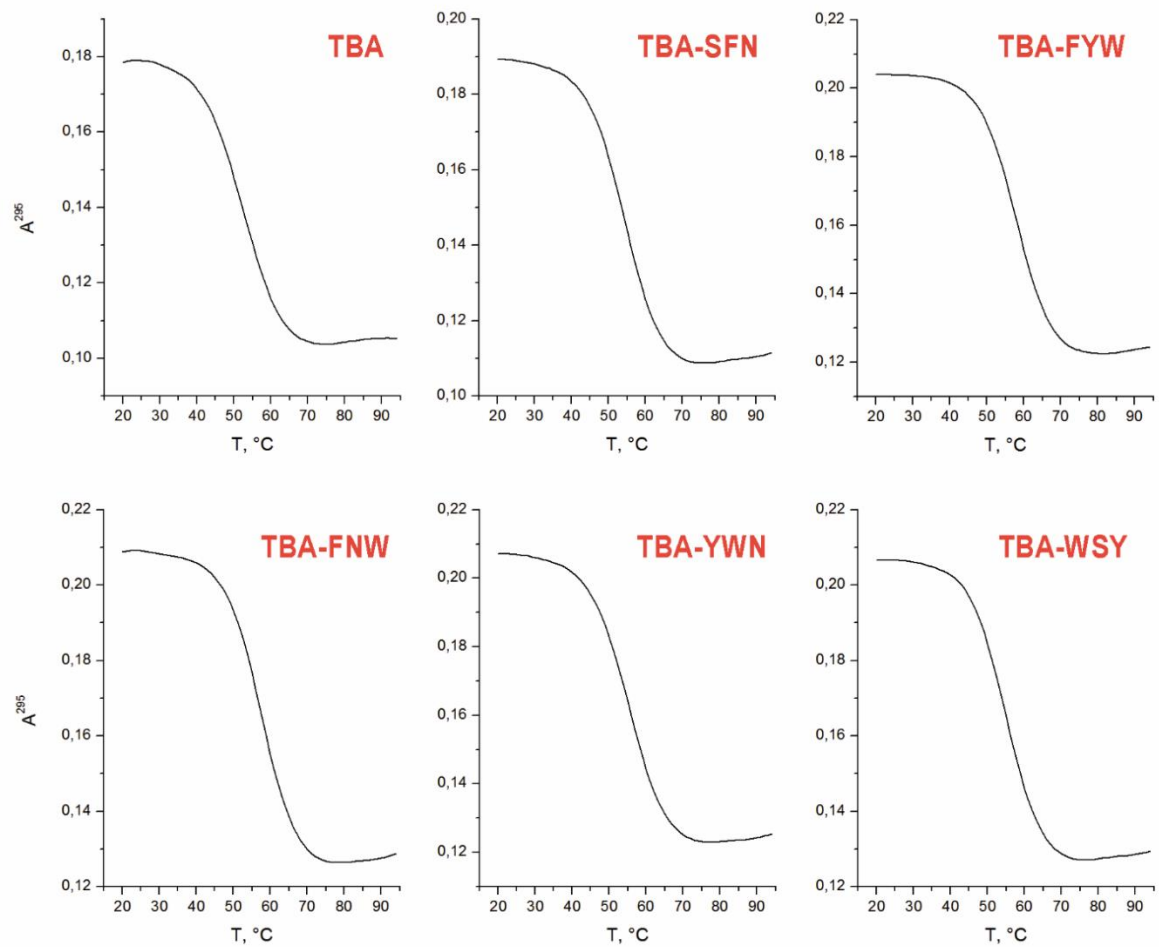

**Figure S1.** Melting profiles of TBA OPCs (295 nm) in 10 mM sodium cacodylate (pH 7.2) and 100 mM KCl at an oligonucleotide concentration of 5  $\mu\text{M}$

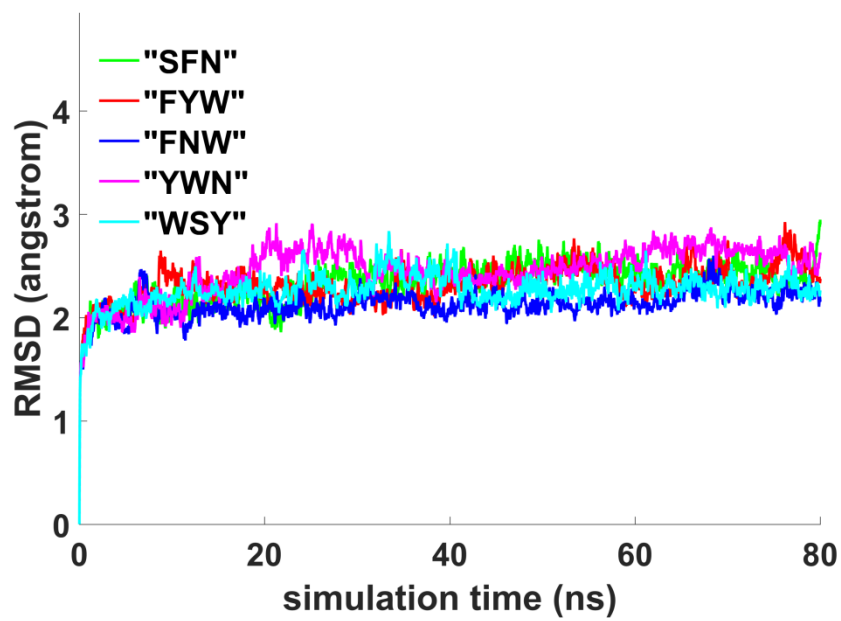

**Figure S2.** RMSD data for TBA-OPC complexes with thrombin.

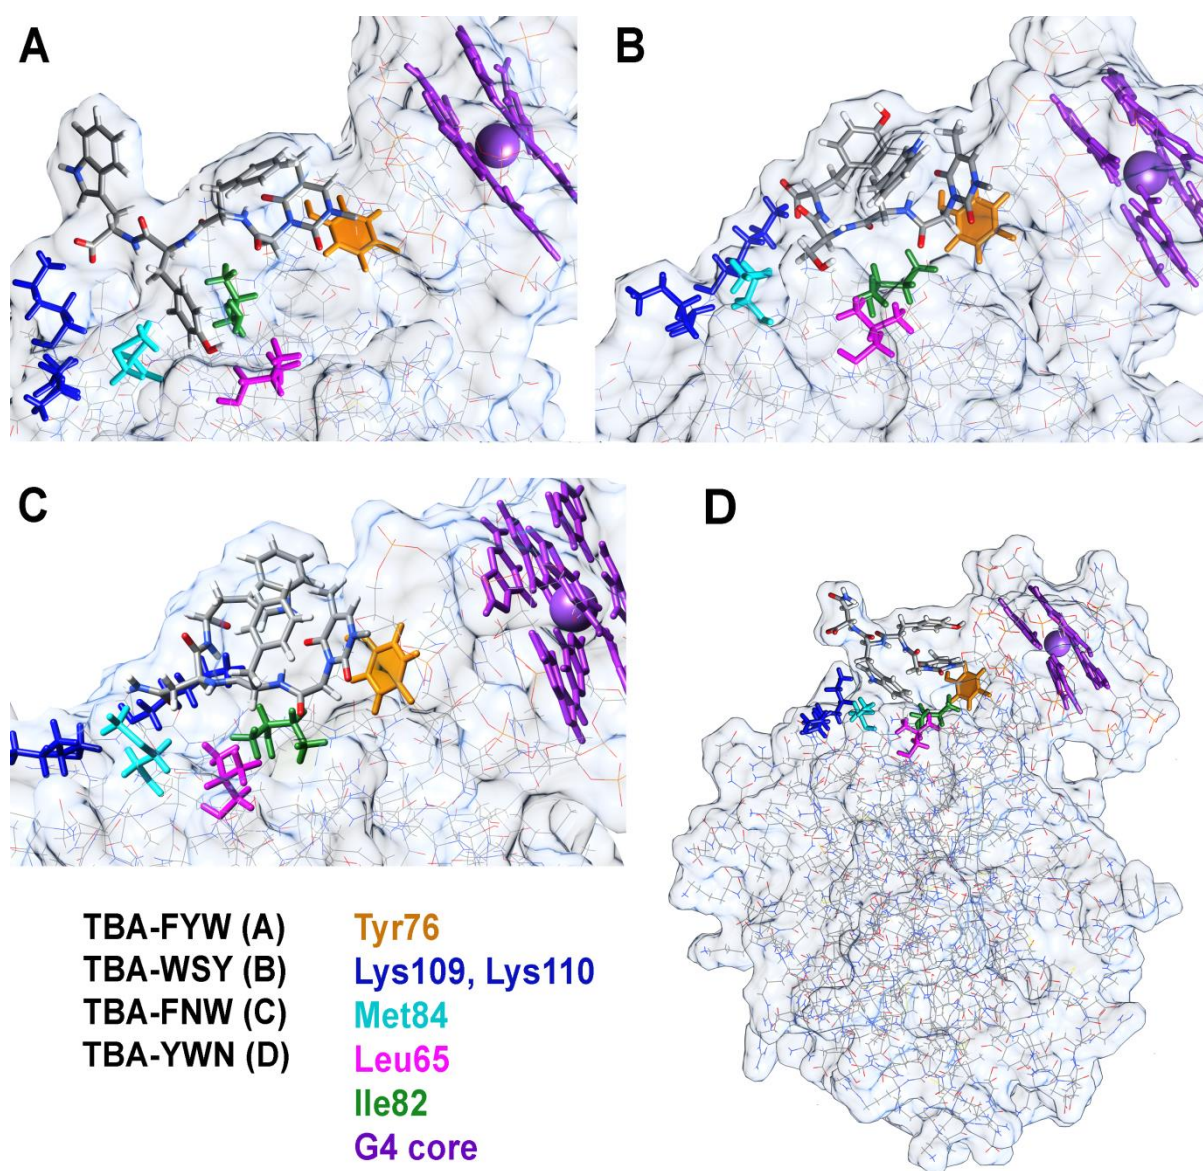

**Figure S3.** Snapshots of thrombin complexes with TBA-FYW, TBA-WSY, TBA-FNW, and TBA-YWN (full size) at 80 ns.

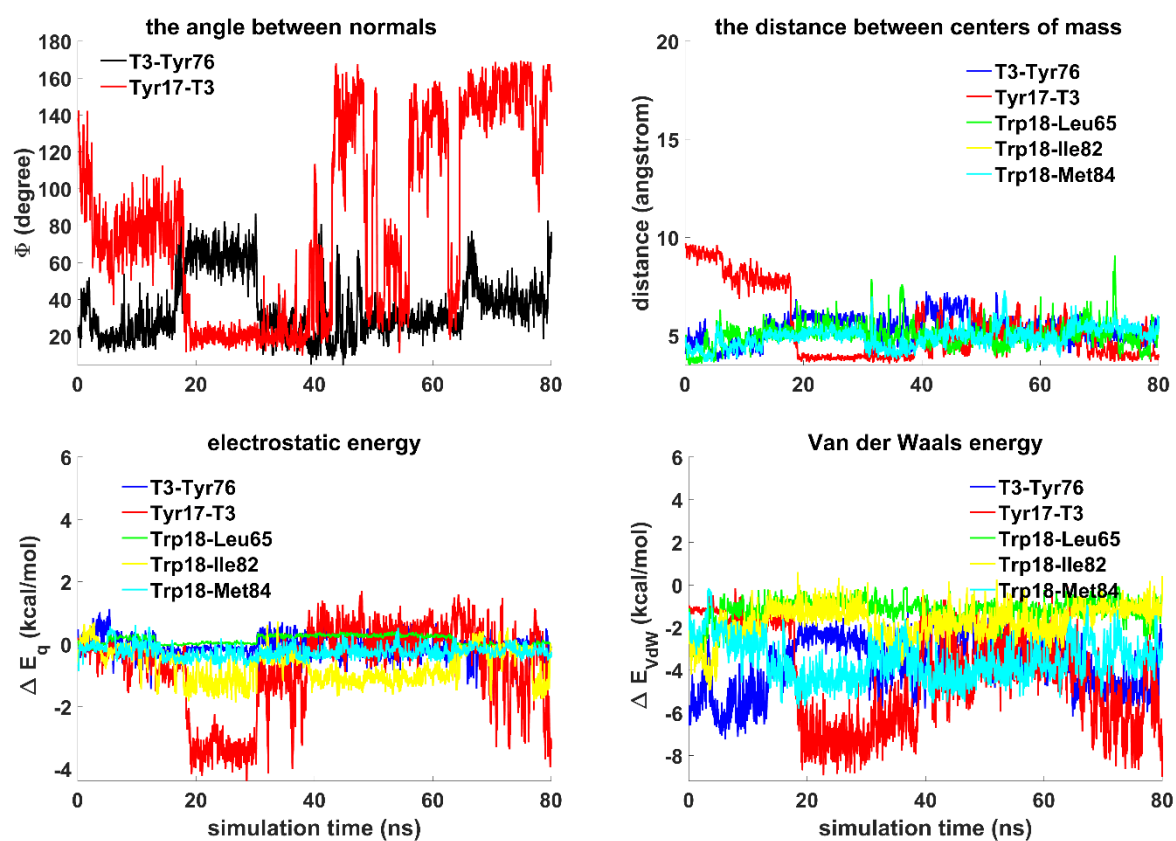

**Figure S4.** Geometrical parameters and energy of interaction between selected residues for TBA-YWN complex with thrombin.

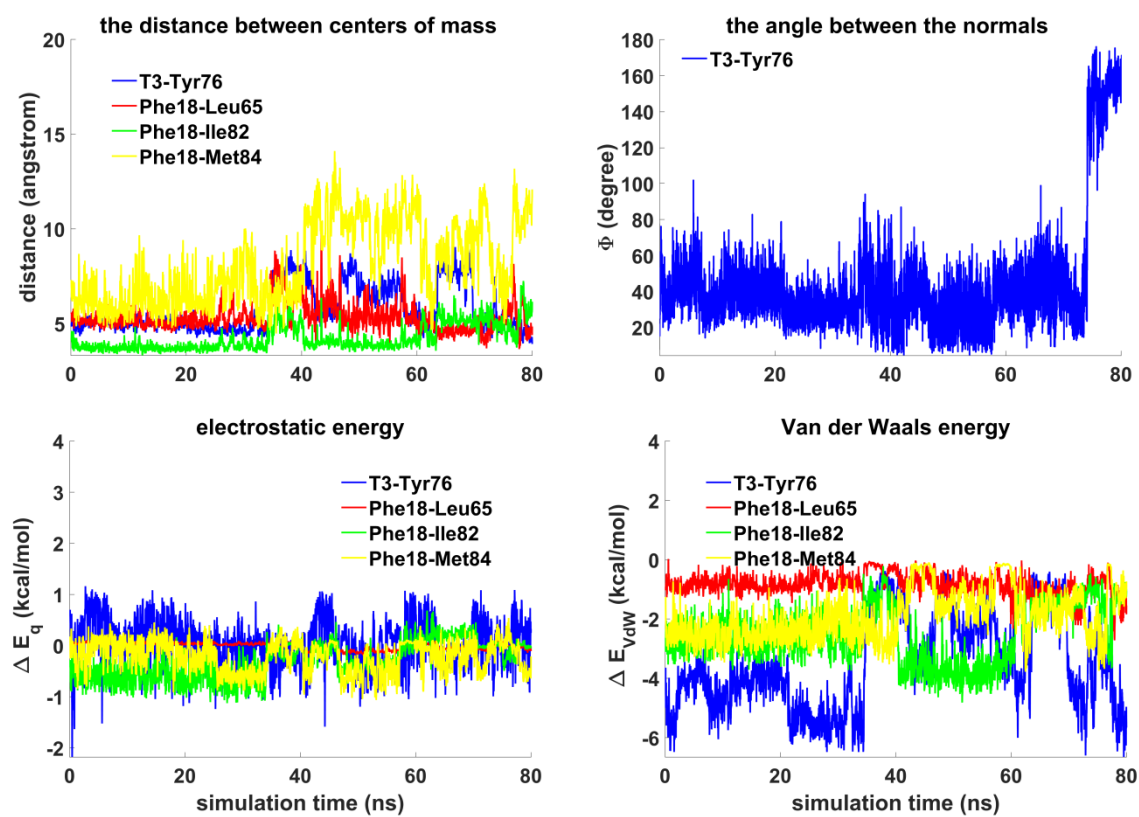

**Figure S5.** Geometrical parameters and energy of interaction between selected residues for TBA-SFN complex with thrombin.

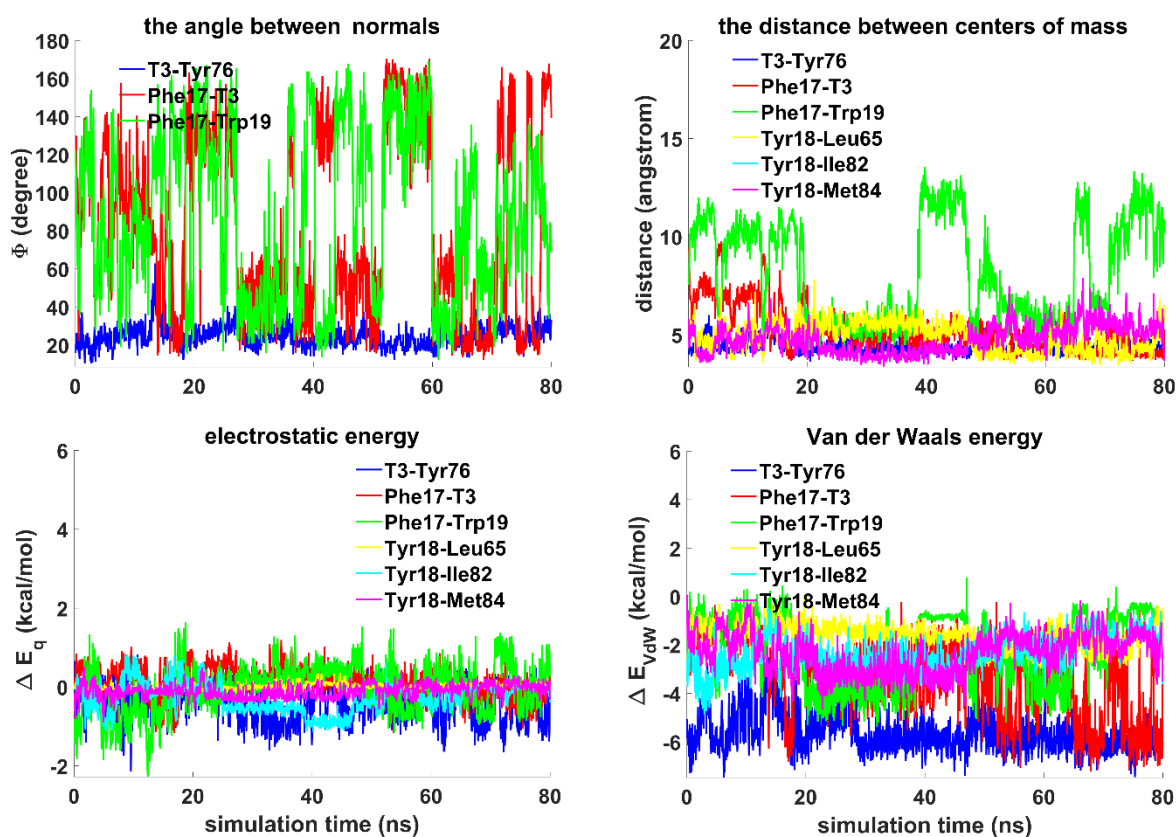

**Figure S6.** Geometrical parameters and energy of interaction between selected residues for TBA-FYW complex with thrombin.

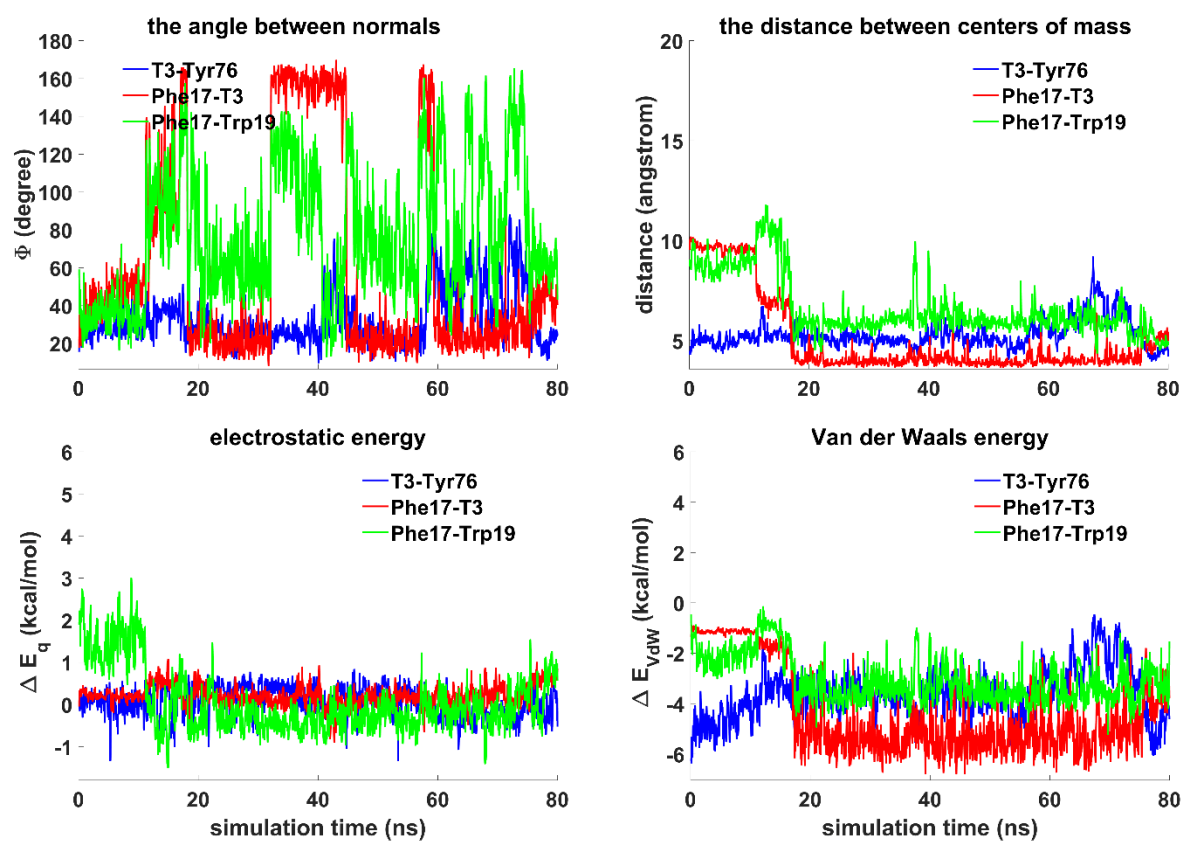

**Figure S7.** Geometrical parameters and energy of interaction between selected residues for TBA-FNW complex with thrombin.



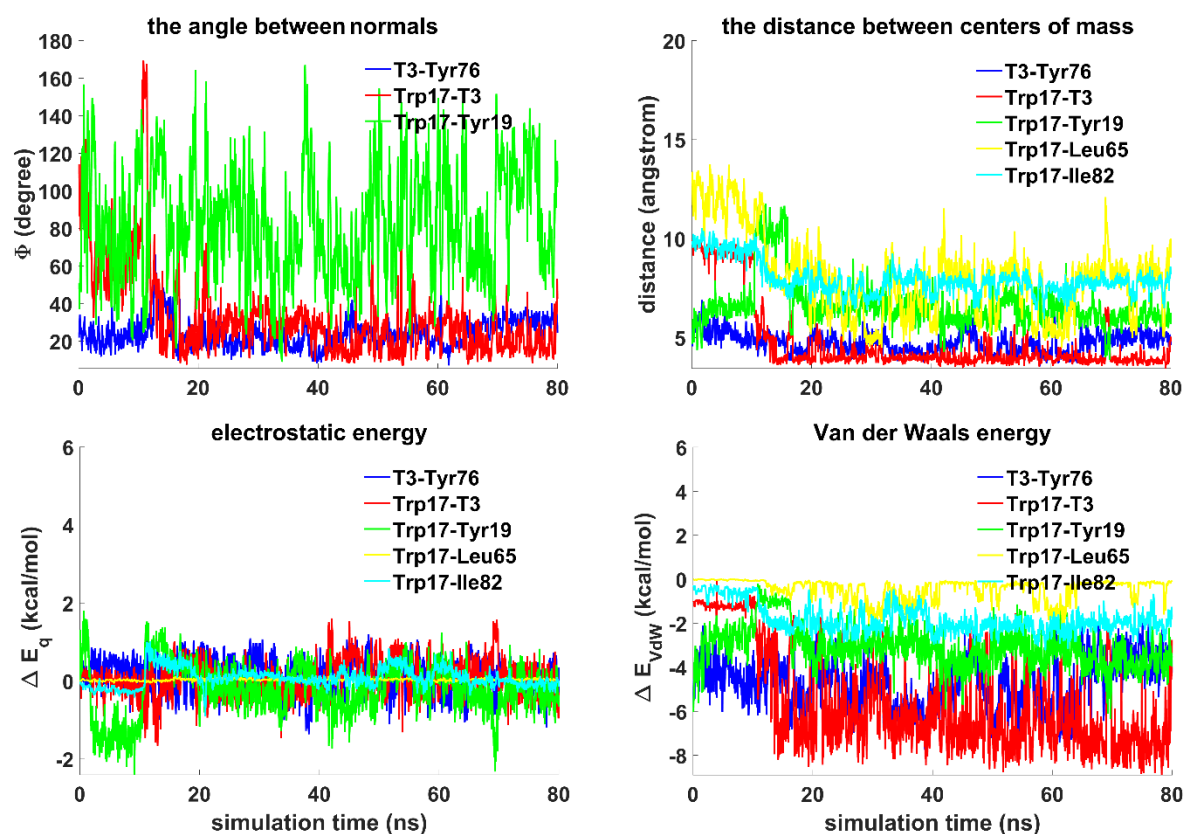

**Figure S8.** Geometrical parameters and energy of interaction between selected residues for TBA-WSY complex with thrombin.

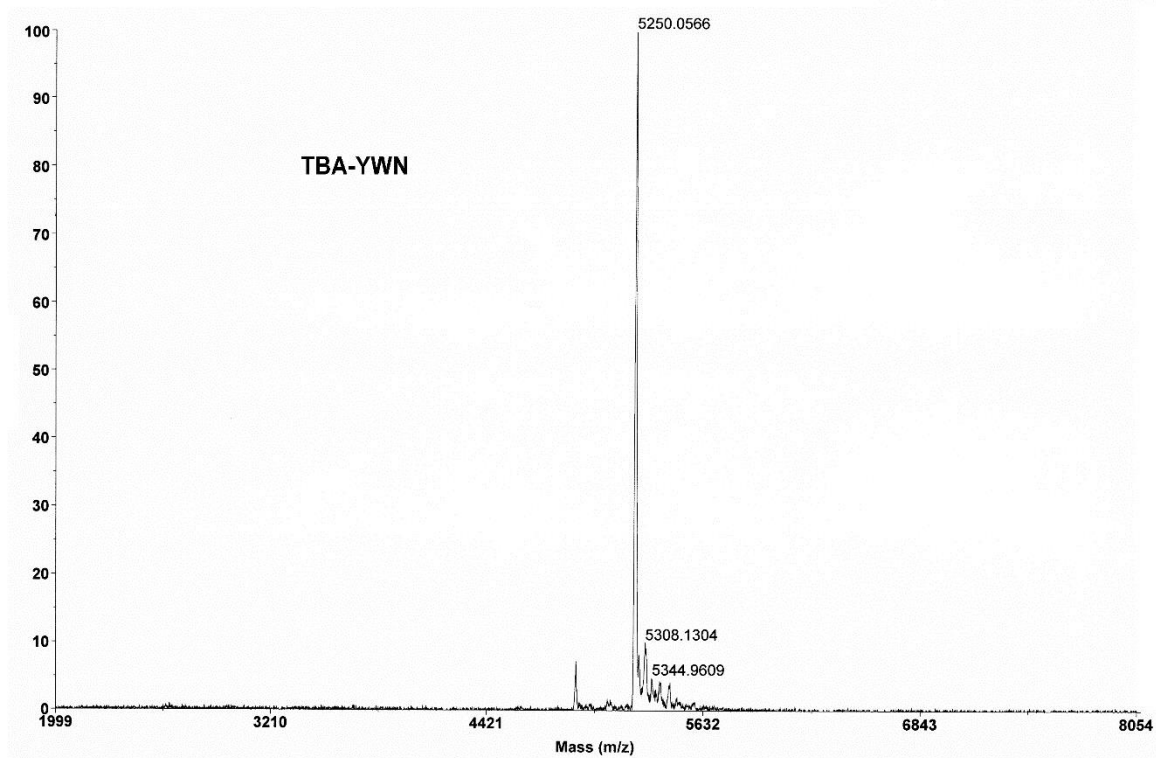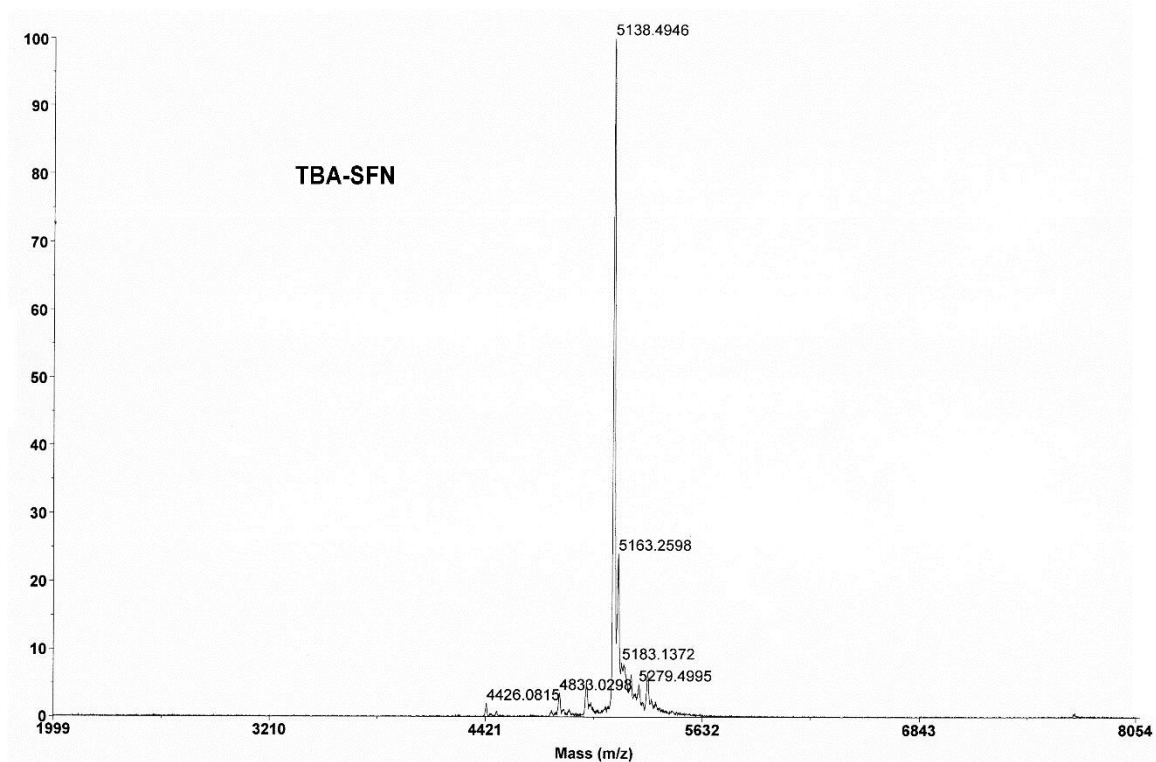

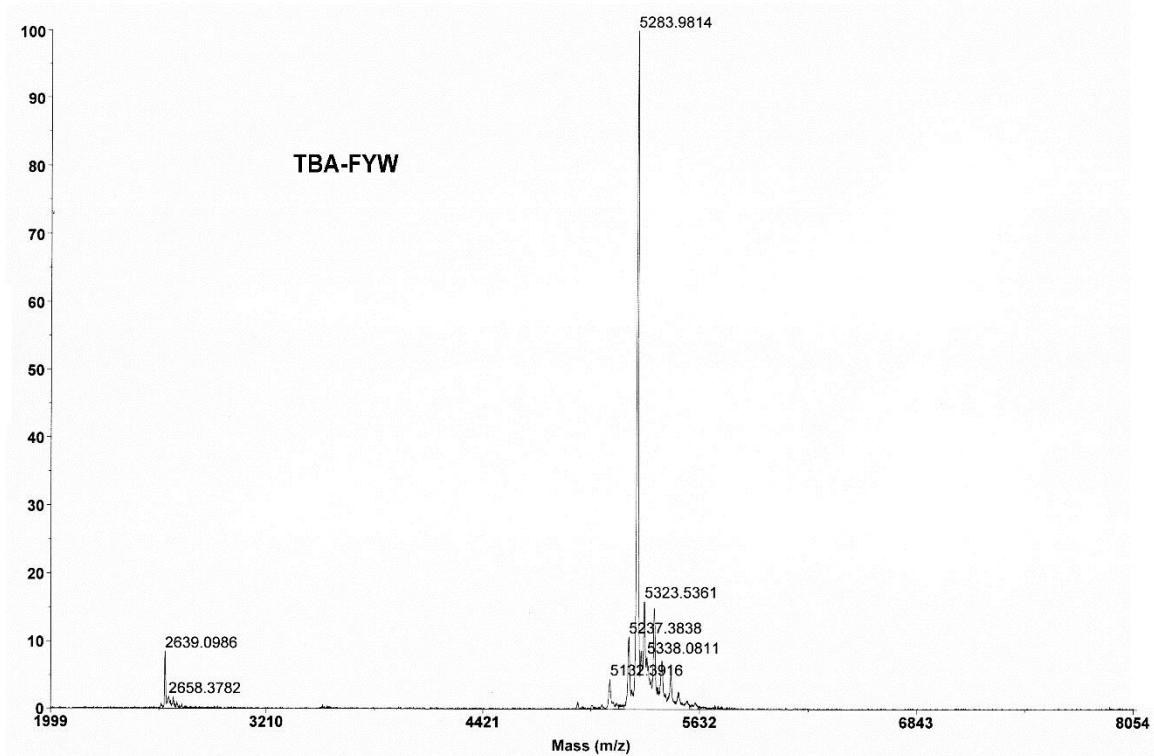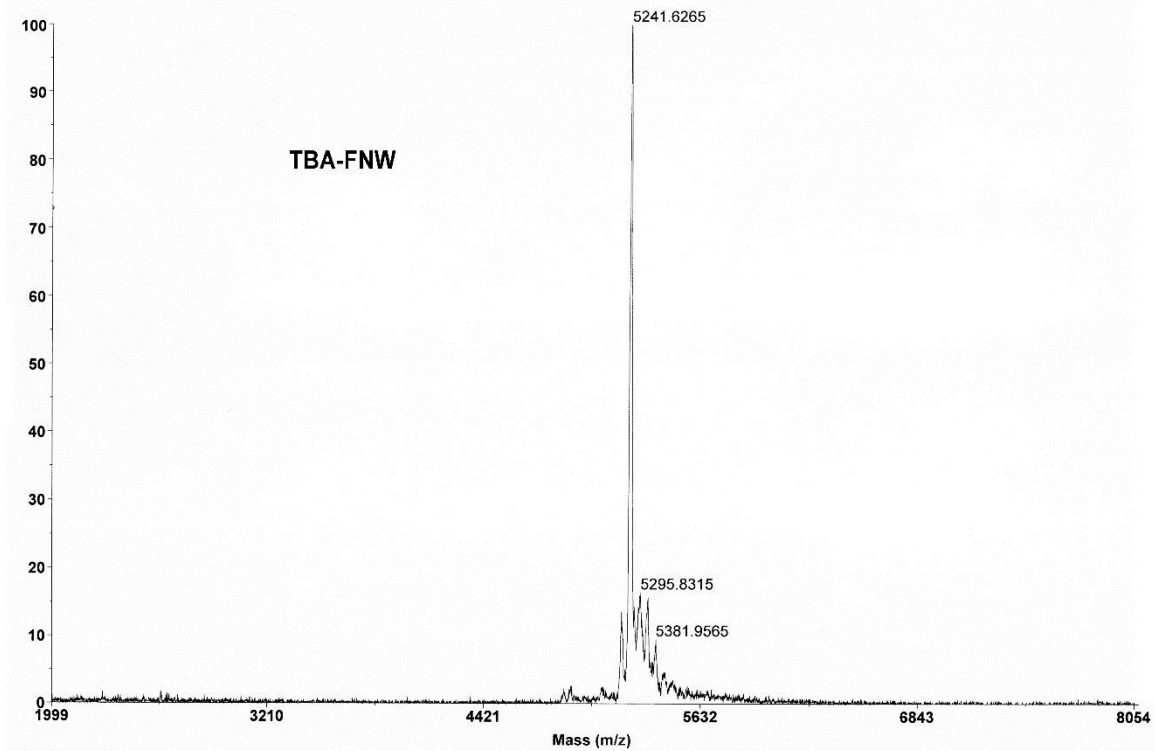

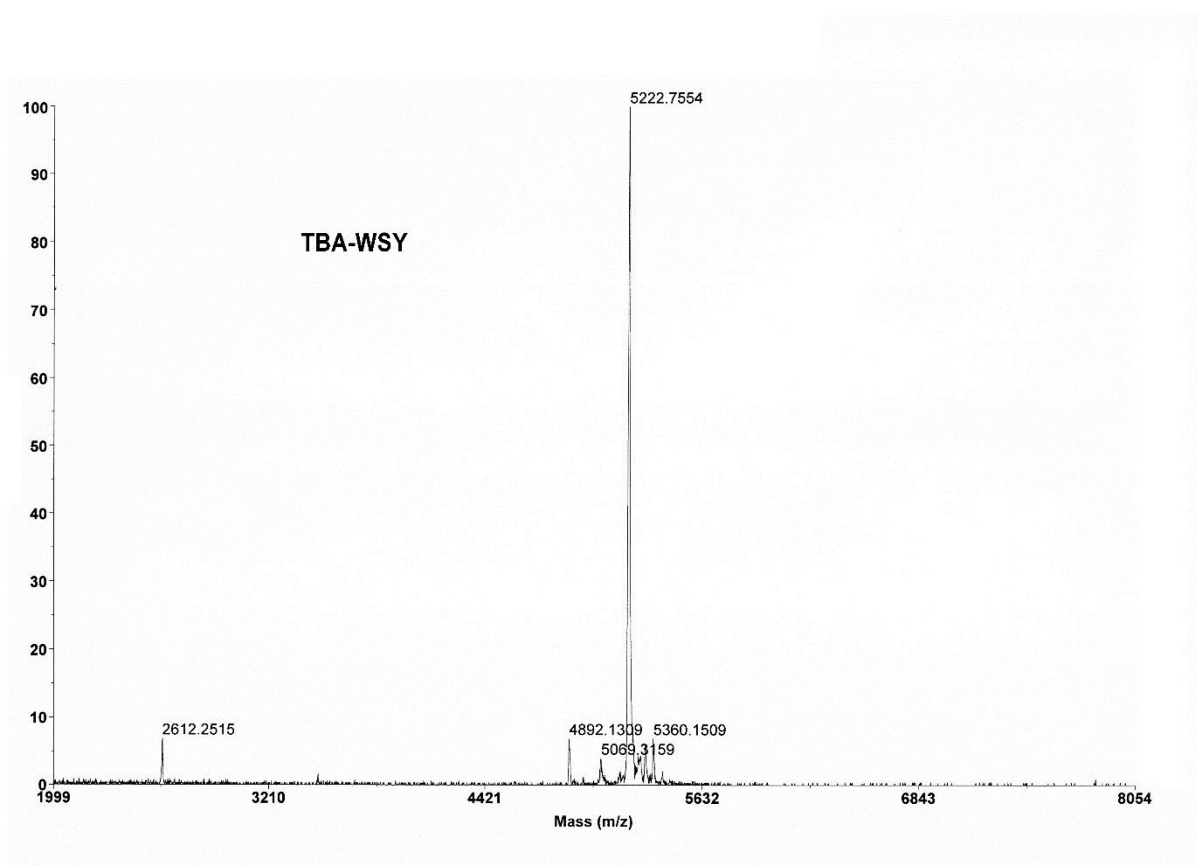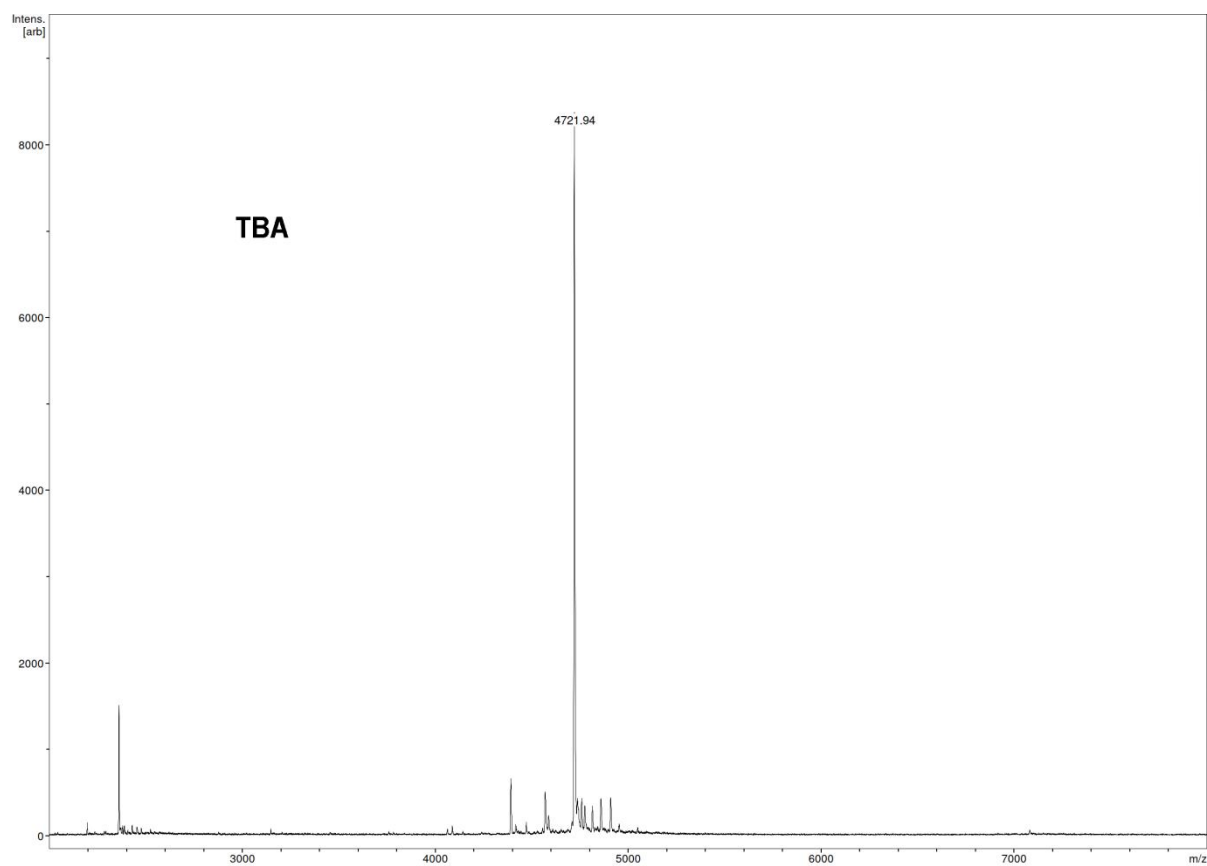

**Figure S9.** MALDI mass spectra of TBA OPCs.
